# Supplementary material for: Does δ 18 O of O 2 record meridional shifts in tropical rainfall?
Source: Copernicus journal article supplement (doi:10.5194/cp-13-1323-2017), 2017-10-11
Supplement: Supplementary file 2 [file cp-13-1323-2017-supplement.zip]

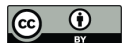

## *Supplement of*

# **Does $\delta^{18}\text{O}$ of $\text{O}_2$ record meridional shifts in tropical rainfall?**

**Alan M. Seltzer et al.**

*Correspondence to:* Alan M. Seltzer (aseltzer@ucsd.edu)

- cp-13-1323-2017-supplement-title-page.pdf
- Movie\_S1.gif
- Movie\_S2.gif
- SupplementalDataset.xlsx
- Supplemental\_Figures.pdf

The copyright of individual parts of the supplement might differ from the CC BY 4.0 License.
