# Supplementary material for: Does δ 18 O of O 2 record meridional shifts in tropical rainfall?
Source: Copernicus journal article supplement (doi:10.5194/cp-13-1323-2017), 2017-10-11
Supplement: Supplementary file 3 [file cp-13-1323-2017-supplement.zip]

Archive with 5 entries (5 files):
- Movie_S2.gif
- Supplemental_Figures.pdf
- SupplementalDataset.xlsx
- cp-13-1323-2017-supplement-title-page.pdf
- Movie_S1.gif
