# Supplementary figures and images for: Does δ 18 O of O 2 record meridional shifts in tropical rainfall?
Source: Copernicus journal article supplement (doi:10.5194/cp-13-1323-2017), 2017-10-11

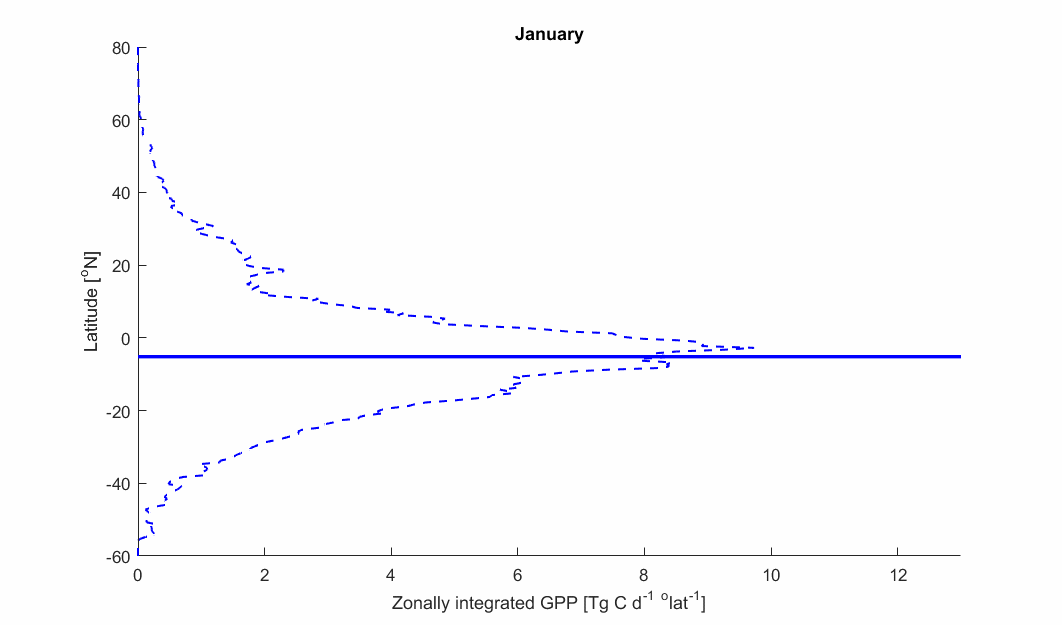

Supplement: Supplementary file 3 [file cp-13-1323-2017-supplement.zip › Movie_S2.gif]

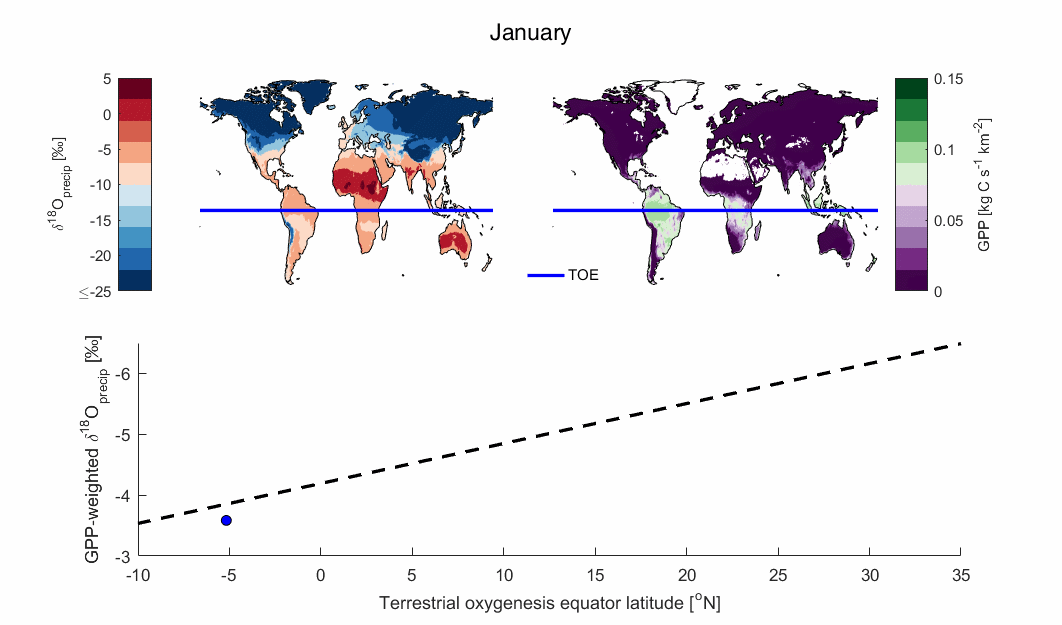

Supplement: Supplementary file 3 [file cp-13-1323-2017-supplement.zip › Movie_S1.gif]
